# Supplementary material
Source: PubMed Central journal article supplement (PMC7796937)
Supplement: NIHMS1633802-supplement-1.pdf [file NIHMS1633802-supplement-1.pdf]

**Supplemental Material for**

**Neurodegenerative hospital admissions and long-term exposure to ambient fine particle air pollution**

Edwin van Wijngaarden<sup>1,2</sup>, David Q. Rich<sup>1,2,5</sup>, Wangjian Zhang<sup>3</sup>, Sally W. Thurston<sup>4</sup>, Shao Lin<sup>3</sup>, Daniel P. Croft<sup>5</sup>, Stefania Squizzato<sup>1</sup>, Mauro Masiol<sup>1</sup>, Philip K. Hopke<sup>1,6</sup>

8. Department of Public Health Sciences, University of Rochester Medical Center, Rochester, NY
9. Department of Environmental Medicine, University of Rochester Medical Center, Rochester, NY
10. Department of Environmental Health Sciences, School of Public Health, State University of New York at Albany, Albany, NY
11. Department of Biostatistics and Computational Biology, University of Rochester Medical Center, Rochester, NY
12. Department of Medicine, University of Rochester Medical Center, Rochester, NY
13. Center for Air Resources Engineering and Science, Clarkson University, Potsdam, NY

**Supplemental Table S1.** Fifteen most common comorbidities (ICD-9 codes) for primary hospital admissions for primary diagnosis of selected neurological diseases, by study site, 2005-2016

|                                                               | Albany |      | Buffalo |      | Rochester |      | Bronx |      | Manhattan |      | Queens |      |
|---------------------------------------------------------------|--------|------|---------|------|-----------|------|-------|------|-----------|------|--------|------|
|                                                               | N      | %    | N       | %    | N         | %    | N     | %    | N         | %    | N      | %    |
| Essential hypertension (401)                                  | 1,031  | 49.8 | 2,042   | 51.3 | 1,314     | 49.0 | 8,808 | 50.3 | 10,299    | 51.3 | 8,907  | 52.5 |
| Persistent mental disorders (294)                             | 1,151  | 55.6 | 1,984   | 49.9 | 1,204     | 44.9 | 8,032 | 45.9 | 8,597     | 42.8 | 7,914  | 46.7 |
| Disorders of lipoid metabolism (272)                          | 678    | 32.8 | 1,193   | 30.0 | 837       | 31.2 | 4,118 | 23.5 | 4,686     | 23.3 | 4,183  | 24.7 |
| Diabetes mellitus (250)                                       | 370    | 17.9 | 740     | 18.6 | 546       | 20.4 | 3,975 | 22.7 | 4,433     | 22.1 | 3,619  | 21.3 |
| Ischemic heart disease, other (414)                           | 373    | 18.0 | 860     | 21.6 | 528       | 19.7 | 2,704 | 15.4 | 3,937     | 19.6 | 3,249  | 19.2 |
| Disorders of fluid, electrolyte, and acid-based balance (276) | 595    | 28.8 | 911     | 22.9 | 588       | 21.9 | 2,862 | 16.3 | 3,335     | 16.6 | 2,924  | 17.2 |
| General symptoms (780)                                        | 312    | 15.1 | 737     | 18.5 | 358       | 13.4 | 2,398 | 13.7 | 2,535     | 12.6 | 2,481  | 14.6 |
| Personal history presenting hazards to health, other (V15)    | 362    | 17.5 | 910     | 22.9 | 606       | 22.6 | 2,000 | 11.4 | 2,355     | 11.7 | 2,204  | 13.0 |
| Cardiac dysrhythmias (427)                                    | 361    | 17.5 | 627     | 15.8 | 452       | 16.9 | 1,757 | 10.0 | 2,356     | 11.7 | 2,190  | 12.9 |
| Post procedural states, other (V45)                           | 259    | 12.5 | 582     | 14.6 | 407       | 15.2 | 1,752 | 10.0 | 2,306     | 11.5 | 2,427  | 14.3 |
| Disorders of urethra and urinary tract (599)                  | 316    | 15.3 | 604     | 15.2 | 355       | 13.2 | 1,938 | 11.1 | 2,207     | 11.0 | 1,873  | 11.0 |
| Acquired hypothyroidism (244)                                 | 284    | 13.7 | 619     | 15.6 | 425       | 15.9 | 1,535 | 8.8  | 2,011     | 10.0 | 1,950  | 11.5 |

|                                                              |     |      |     |      |     |      |       |     |       |      |       |      |
|--------------------------------------------------------------|-----|------|-----|------|-----|------|-------|-----|-------|------|-------|------|
| Symptoms involving nervous and musculoskeletal systems (781) | 247 | 11.9 | 451 | 11.3 | 233 | 8.7  | 1,690 | 9.7 | 2,025 | 10.1 | 1,568 | 9.2  |
| Personal history of certain other diseases (V12)             | 204 | 9.9  | 499 | 12.5 | 335 | 12.5 | 1,652 | 9.4 | 1,793 | 8.9  | 1,728 | 10.2 |
| Depressive disorder, not elsewhere classified (311)          | 349 | 16.9 | 569 | 14.3 | 401 | 15.0 | 1,590 | 9.1 | 1,652 | 8.2  | 1,521 | 9.0  |

---

Journal Pre-proof

**Supplemental Table S2a.** Correlation coefficients (p values) between PM<sub>2.5</sub> and PM<sub>2.5</sub> source concentration, lag 0-29, 2005-2016

|       | PM2.5   | AS      | AN      | GAS     | DIE     | RD      | BB      | OP      |
|-------|---------|---------|---------|---------|---------|---------|---------|---------|
|       | 1.000   | 0.666   | 0.343   | 0.076   | 0.279   | 0.304   | 0.205   | 0.496   |
| PM2.5 | (0.000) | (0.000) | (0.000) | (0.000) | (0.000) | (0.000) | (0.000) | (0.000) |
|       |         | 1.000   | 0.111   | -0.145  | 0.205   | 0.182   | 0.041   | 0.372   |
| AS    |         | (0.000) | (0.000) | (0.000) | (0.000) | (0.000) | (0.000) | (0.000) |
|       |         |         | 1.000   | -0.385  | -0.085  | -0.120  | 0.376   | -0.065  |
| AN    |         |         | (0.000) | (0.000) | (0.000) | (0.000) | (0.000) | (0.000) |
|       |         |         |         | 1.000   | -0.019  | 0.115   | -0.028  | -0.018  |
| GAS   |         |         |         | (0.000) | (0.003) | (0.000) | (0.000) | (0.025) |
|       |         |         |         |         | 1.000   | 0.347   | -0.153  | 0.082   |
| DIE   |         |         |         |         | (0.000) | (0.000) | (0.000) | (0.000) |
|       |         |         |         |         |         | 1.000   | -0.268  | 0.240   |
| RD    |         |         |         |         |         | (0.000) | (0.000) | (0.000) |
|       |         |         |         |         |         |         | 1.000   | -0.051  |
| BB    |         |         |         |         |         |         | (0.000) | (0.000) |
|       |         |         |         |         |         |         |         | 1.000   |
| OP    |         |         |         |         |         |         |         | (0.000) |

**Supplemental Table S2b.** Correlation coefficients (p values) between PM<sub>2.5</sub> and PM<sub>2.5</sub> source concentration, lag 0-179, 2005-2016

|       | PM2.5   | AS      | AN      | GAS     | DIE     | RD      | BB      | OP      |
|-------|---------|---------|---------|---------|---------|---------|---------|---------|
|       | 1.000   | 0.754   | 0.343   | -0.194  | 0.526   | 0.509   | 0.021   | 0.522   |
| PM2.5 | (0.000) | (0.000) | (0.000) | (0.000) | (0.000) | (0.000) | (0.002) | (0.000) |
|       |         | 1.000   | 0.128   | -0.290  | 0.353   | 0.243   | 0.031   | 0.422   |
| AS    |         | (0.000) | (0.000) | (0.000) | (0.000) | (0.000) | (0.000) | (0.000) |
|       |         |         | 1.000   | -0.450  | -0.008  | -0.127  | 0.450   | -0.081  |
| AN    |         |         | (0.000) | (0.000) | (0.220) | (0.000) | (0.000) | (0.000) |
|       |         |         |         | 1.000   | -0.085  | 0.039   | -0.150  | -0.175  |
| GAS   |         |         |         | (0.000) | (0.000) | (0.000) | (0.000) | (0.000) |
|       |         |         |         |         | 1.000   | 0.440   | -0.108  | 0.105   |
| DIE   |         |         |         |         | (0.000) | (0.000) | (0.000) | (0.000) |
|       |         |         |         |         |         | 1.000   | -0.408  | 0.428   |
| RD    |         |         |         |         |         | (0.000) | (0.000) | (0.000) |
|       |         |         |         |         |         |         | 1.000   | -0.191  |
| BB    |         |         |         |         |         |         | (0.000) | (0.000) |

Journal Pre-proof

**Supplemental Table S2c.** Correlation coefficients (p values) between PM<sub>2.5</sub> and PM<sub>2.5</sub> source concentration, lag 0-364, 2005-2016

|       | PM2.5   | AS      | AN      | GAS     | DIE     | RD      | BB      | OP      |
|-------|---------|---------|---------|---------|---------|---------|---------|---------|
|       | 1.000   | 0.818   | 0.394   | -0.295  | 0.580   | 0.575   | -0.078  | 0.554   |
| PM2.5 | (0.000) | (0.000) | (0.000) | (0.000) | (0.000) | (0.000) | (0.000) | (0.000) |
|       |         | 1.000   | 0.476   | -0.513  | 0.417   | 0.279   | 0.124   | 0.416   |
| AS    |         | (0.000) | (0.000) | (0.000) | (0.000) | (0.000) | (0.000) | (0.000) |
|       |         |         | 1.000   | -0.343  | 0.151   | -0.181  | 0.466   | -0.075  |
| AN    |         |         | (0.000) | (0.000) | (0.000) | (0.000) | (0.000) | (0.000) |
|       |         |         |         | 1.000   | -0.222  | -0.014  | -0.132  | -0.256  |
| GAS   |         |         |         | (0.000) | (0.000) | (0.038) | (0.000) | (0.000) |
|       |         |         |         |         | 1.000   | 0.460   | -0.054  | 0.078   |
| DIE   |         |         |         |         | (0.000) | (0.000) | (0.000) | (0.000) |
|       |         |         |         |         |         | 1.000   | -0.505  | 0.494   |
| RD    |         |         |         |         |         | (0.000) | (0.000) | (0.000) |
|       |         |         |         |         |         |         | 0.416   | 0.185   |
| RS    |         |         |         |         |         |         | (0.000) | (0.000) |
|       |         |         |         |         |         |         | 1.000   | -0.315  |
| BB    |         |         |         |         |         |         | (0.000) | (0.000) |
|       |         |         |         |         |         |         |         | 1.000   |
| OP    |         |         |         |         |         |         |         | (0.000) |

**Supplemental Table S3.** Rate ratio (95% confidence interval (CI)) of total and cause-specific neurological disease hospital admissions associated with each interquartile range (IQR) increase in PM<sub>2.5</sub> concentration, by lag time and outcome, 2005-2016

| Outcome/Lag                | Albany              | Bronx             | Buffalo            | Manhattan         | Queens            | Rochester         |
|----------------------------|---------------------|-------------------|--------------------|-------------------|-------------------|-------------------|
| <b>Total</b>               |                     |                   |                    |                   |                   |                   |
| 0                          | 1.01 (0.95, 1.07)   | 1.01 (0.99, 1.03) | 0.98 (0.94, 1.02)  | 0.99 (0.97, 1.01) | 1.01 (0.99, 1.03) | 1.02 (0.96, 1.07) |
| 0-13                       | 1.08 (0.98, 1.19)   | 1.01 (0.98, 1.05) | 1.05 (0.98, 1.12)  | 1.01 (0.97, 1.04) | 1.03 (1.00, 1.07) | 0.99 (0.91, 1.08) |
| 0-29                       | 1.07 (0.94, 1.21)   | 1.00 (0.95, 1.05) | 1.08 (0.98, 1.18)  | 1.04 (1.00, 1.09) | 1.05 (1.00, 1.10) | 0.98 (0.88, 1.10) |
| 0-179                      | 1.22 (0.73, 2.05)   | 0.88 (0.66, 1.16) | 1.37 (0.98, 1.92)  | 0.97 (0.78, 1.21) | 1.12 (0.91, 1.37) | 1.27 (0.79, 2.04) |
| 0-364                      | 1.94 (0.73, 5.16)   | 1.05 (0.58, 1.90) | 1.66 (0.90, 3.04)  | 1.16 (0.75, 1.81) | 0.77 (0.49, 1.23) | 1.13 (0.52, 2.48) |
| <b>Alzheimer's disease</b> |                     |                   |                    |                   |                   |                   |
| 0                          | 0.98 (0.91, 1.06)   | 1.00 (0.97, 1.03) | 0.99 (0.94, 1.05)  | 0.99 (0.96, 1.02) | 1.01 (0.98, 1.03) | 1.05 (0.98, 1.13) |
| 0-13                       | 1.11 (0.98, 1.25)   | 1.00 (0.95, 1.04) | 1.10 (1.01, 1.20)  | 1.00 (0.95, 1.05) | 1.01 (0.97, 1.06) | 1.00 (0.90, 1.13) |
| 0-29                       | 1.13 (0.97, 1.33)   | 0.99 (0.93, 1.06) | 1.13 (1.01, 1.27)  | 1.02 (0.96, 1.09) | 1.01 (0.94, 1.08) | 1.06 (0.91, 1.24) |
| 0-179                      | 1.17 (0.62, 2.19)   | 0.85 (0.59, 1.22) | 1.40 (0.92, 2.13)  | 0.86 (0.65, 1.13) | 1.13 (0.87, 1.46) | 1.44 (0.75, 2.75) |
| 0-364                      | 1.66 (0.49, 5.56)   | 1.80 (0.82, 3.96) | 2.00 (0.95, 4.23)  | 0.97 (0.54, 1.71) | 0.83 (0.45, 1.52) | 1.41 (0.48, 4.13) |
| <b>Dementia</b>            |                     |                   |                    |                   |                   |                   |
| 0                          | 1.04 (0.88, 1.23)   | 1.01 (0.97, 1.05) | 0.98 (0.88, 1.10)  | 0.99 (0.95, 1.03) | 1.01 (0.97, 1.06) | 1.06 (0.96, 1.17) |
| 0-13                       | 1.00 (0.76, 1.33)   | 1.03 (0.97, 1.11) | 0.96 (0.80, 1.15)  | 1.01 (0.95, 1.08) | 1.01 (0.95, 1.08) | 1.01 (0.86, 1.18) |
| 0-29                       | 0.88 (0.61, 1.28)   | 1.00 (0.91, 1.10) | 0.97 (0.77, 1.24)  | 1.06 (0.97, 1.15) | 1.03 (0.93, 1.13) | 0.90 (0.73, 1.11) |
| 0-179                      | 2.78 (0.54, 14.23)  | 0.96 (0.55, 1.67) | 1.26 (0.52, 3.07)  | 1.41 (0.92, 2.14) | 0.97 (0.63, 1.49) | 1.32 (0.54, 3.20) |
| 0-364                      | 5.04 (0.25, 100.64) | 0.55 (0.18, 1.72) | 1.92 (0.36, 10.21) | 2.28 (0.98, 5.32) | 0.41 (0.16, 1.07) | 2.11 (0.49, 9.11) |
| <b>Parkinson' disease</b>  |                     |                   |                    |                   |                   |                   |
| 0                          | 1.07 (0.94, 1.22)   | 1.04 (0.99, 1.10) | 0.91 (0.83, 1.01)  | 0.97 (0.92, 1.03) | 1.03 (0.98, 1.08) | 0.86 (0.75, 0.99) |
| 0-13                       | 1.03 (0.82, 1.28)   | 1.02 (0.93, 1.11) | 0.95 (0.81, 1.11)  | 1.03 (0.95, 1.12) | 1.12 (1.04, 1.21) | 0.94 (0.77, 1.15) |
| 0-29                       | 0.96 (0.72, 1.29)   | 0.99 (0.88, 1.11) | 0.99 (0.80, 1.22)  | 1.07 (0.96, 1.20) | 1.21 (1.09, 1.35) | 0.89 (0.69, 1.16) |
| 0-179                      | 0.90 (0.28, 2.85)   | 0.80 (0.40, 1.61) | 1.22 (0.56, 2.68)  | 0.78 (0.46, 1.33) | 1.26 (0.79, 2.00) | 0.78 (0.26, 2.37) |
| 0-364                      | 1.72 (0.21, 14.07)  | 0.53 (0.12, 2.24) | 0.74 (0.18, 3.02)  | 0.82 (0.28, 2.37) | 1.39 (0.47, 4.04) | 0.33 (0.05, 2.09) |

\* Models adjusted for temperature (4df) and relative humidity using natural splines (3df)

\* P values in bold indicate statistically significant associations at  $\alpha=0.05$

**Supplemental Table S4.** Rate ratio (95% confidence interval (CI)) of total and cause-specific neurological disease hospital admissions associated with each interquartile range (IQR) increase in PM<sub>2.5</sub> source concentration, by lag time and outcome, 2005-2016

| PM <sub>2.5</sub> or<br>PM <sub>2.5</sub><br>Source | IQR *<br>(µg/m <sup>3</sup> ) | Total |                         |       | Alzheimer's Disease |                         |       | Dementia |                         |       | Parkinson's Disease |                         |       |
|-----------------------------------------------------|-------------------------------|-------|-------------------------|-------|---------------------|-------------------------|-------|----------|-------------------------|-------|---------------------|-------------------------|-------|
|                                                     |                               | N     | Rate Ratio*<br>(95% CI) | P*    | N                   | Rate Ratio*<br>(95% CI) | P*    | N        | Rate Ratio*<br>(95% CI) | P*    | N                   | Rate Ratio*<br>(95% CI) | P*    |
| <b>PM<sub>2.5</sub></b>                             |                               |       |                         |       |                     |                         |       |          |                         |       |                     |                         |       |
| 0                                                   | 6.3                           | 27532 | 1.01 (0.99, 1.02)       | 0.45  | 15328               | 1.00 (0.98, 1.02)       | 0.95  | 7425     | 1.01 (0.98, 1.04)       | 0.39  | 4779                | 1.01 (0.98, 1.05)       | 0.52  |
| 0-13                                                | 4.9                           | 55248 | 1.02 (1.00, 1.03)       | 0.01  | 31035               | 1.02 (1.00, 1.03)       | 0.11  | 14531    | 1.01 (0.98, 1.04)       | 0.42  | 9682                | 1.03 (1.00, 1.07)       | 0.041 |
| <b>Road Dust (RD)</b>                               |                               |       |                         |       |                     |                         |       |          |                         |       |                     |                         |       |
| 0                                                   | 6.1                           | 27001 | 0.98 (0.80, 1.20)       | 0.84  | 15026               | 0.97 (0.74, 1.28)       | 0.84  | 7286     | 1.13 (0.78, 1.65)       | 0.51  | 4689                | 0.73 (0.45, 1.20)       | 0.21  |
| 0-13                                                | 5.0                           | 55072 | 0.99 (0.80, 1.23)       | 0.94  | 30935               | 0.92 (0.69, 1.22)       | 0.56  | 14495    | 1.20 (0.80, 1.79)       | 0.38  | 9642                | 0.95 (0.58, 1.56)       | 0.84  |
| <b>Secondary Sulfate (AS)</b>                       |                               |       |                         |       |                     |                         |       |          |                         |       |                     |                         |       |
| 0                                                   | 6.1                           | 27001 | 1.01 (0.99, 1.04)       | 0.32  | 15026               | 1.01 (0.98, 1.05)       | 0.46  | 7286     | 1.01 (0.96, 1.06)       | 0.81  | 4689                | 1.03 (0.97, 1.10)       | 0.35  |
| 0-13                                                | 5.0                           | 55072 | 1.03 (1.00, 1.05)       | 0.018 | 30935               | 1.03 (1.00, 1.06)       | 0.045 | 14495    | 1.00 (0.95, 1.05)       | 0.90  | 9642                | 1.06 (1.00, 1.12)       | 0.037 |
| <b>Secondary Nitrate (AN)</b>                       |                               |       |                         |       |                     |                         |       |          |                         |       |                     |                         |       |
| 0                                                   | 6.1                           | 27001 | 1.01 (0.98, 1.05)       | 0.48  | 15026               | 0.99 (0.94, 1.04)       | 0.58  | 7286     | 1.05 (0.97, 1.13)       | 0.21  | 4689                | 1.06 (0.96, 1.16)       | 0.26  |
| 0-13                                                | 5.0                           | 55072 | 0.98 (0.94, 1.02)       | 0.29  | 30935               | 0.97 (0.92, 1.02)       | 0.27  | 14495    | 0.99 (0.91, 1.07)       | 0.74  | 9642                | 1.00 (0.91, 1.11)       | 0.94  |
| <b>Diesel (DIE)</b>                                 |                               |       |                         |       |                     |                         |       |          |                         |       |                     |                         |       |
| 0                                                   | 6.1                           | 27001 | 0.97 (0.87, 1.08)       | 0.53  | 15026               | 0.89 (0.78, 1.03)       | 0.13  | 7286     | 1.20 (0.98, 1.47)       | 0.075 | 4689                | 0.88 (0.67, 1.14)       | 0.32  |
| 0-13                                                | 5.0                           | 55072 | 0.98 (0.88, 1.08)       | 0.66  | 30935               | 0.97 (0.85, 1.11)       | 0.70  | 14495    | 0.92 (0.75, 1.14)       | 0.45  | 9642                | 1.09 (0.86, 1.40)       | 0.47  |
| <b>Spark-Ignition Emissions (GAS)</b>               |                               |       |                         |       |                     |                         |       |          |                         |       |                     |                         |       |
| 0                                                   | 6.1                           | 27001 | 0.97 (0.92, 1.03)       | 0.37  | 15026               | 0.97 (0.90, 1.05)       | 0.49  | 7286     | 1.00 (0.89, 1.11)       | 0.96  | 4689                | 0.94 (0.83, 1.08)       | 0.38  |
| 0-13                                                | 5.0                           | 55072 | 1.03 (0.97, 1.09)       | 0.39  | 30935               | 1.01 (0.94, 1.09)       | 0.74  | 14495    | 1.07 (0.96, 1.19)       | 0.25  | 9642                | 1.01 (0.88, 1.15)       | 0.91  |
| <b>Biomass burning (BB)</b>                         |                               |       |                         |       |                     |                         |       |          |                         |       |                     |                         |       |
| 0                                                   | 6.1                           | 27001 | 0.85 (0.71, 1.03)       | 0.091 | 15026               | 0.87 (0.69, 1.10)       | 0.25  | 7286     | 0.78 (0.53, 1.15)       | 0.21  | 4689                | 0.95 (0.62, 1.45)       | 0.80  |
| 0-13                                                | 5.0                           | 55072 | 0.99 (0.85, 1.15)       | 0.86  | 30935               | 1.02 (0.84, 1.23)       | 0.86  | 14495    | 0.88 (0.63, 1.22)       | 0.43  | 9642                | 1.05 (0.73, 1.50)       | 0.79  |
| <b>Pyrolyzed Organic Rich (OP)</b>                  |                               |       |                         |       |                     |                         |       |          |                         |       |                     |                         |       |
| 0                                                   | 5.6                           | 18449 | 0.99 (0.94, 1.06)       | 0.84  | 10027               | 1.00 (0.92, 1.08)       | 0.96  | 5049     | 0.98 (0.87, 1.11)       | 0.76  | 3373                | 0.97 (0.84, 1.12)       | 0.68  |
| 0-13                                                | 4.5                           | 37791 | 1.02 (0.96, 1.09)       | 0.44  | 20845               | 1.03 (0.96, 1.12)       | 0.40  | 10130    | 1.07 (0.95, 1.19)       | 0.28  | 6816                | 0.92 (0.79, 1.06)       | 0.24  |

\* Models adjusted for day of the week, public holidays, time trend (4df/year), temperature (4df) and relative humidity using natural splines (3df);

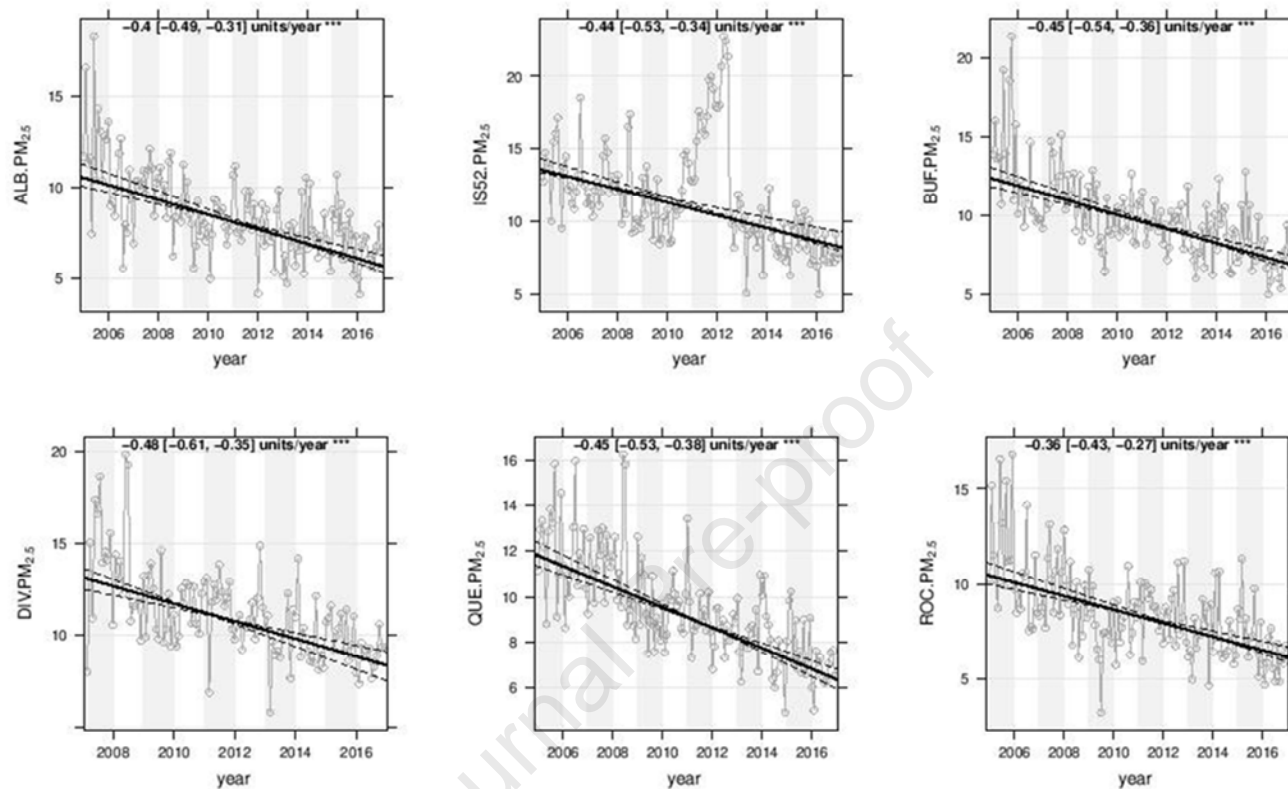

Figure S1. Time series of  $PM_{2.5}$  concentrations at the 6 NYS urban sites.
